# Supplementary material
Source: PubMed Central journal article supplement (PMC6442683)
Supplement: NIHMS1005382-supplement-sup.pdf [file NIHMS1005382-supplement-sup.pdf]

**Table S1. Neuropsychiatric risk loci with a reported effect on structural plasticity**

| Gene or copy number variant | Gene name or description                     | Type of effect on spines and/or dendrites    | Disease associations                                      |
|-----------------------------|----------------------------------------------|----------------------------------------------|-----------------------------------------------------------|
| <b>Cell adhesion</b>        |                                              |                                              |                                                           |
| <i>NRXN1</i>                | Neurexin 1                                   | spine stability <sup>1</sup>                 | SZ <sup>2</sup> and ASD <sup>3</sup>                      |
| <i>NLGN3</i>                | Neuroigin 3                                  | spine density <sup>4</sup>                   | ASD <sup>5</sup>                                          |
| <i>CNTNAP2</i>              | Contactin associated protein like 2 (CASPR2) | spine and dendrite stability <sup>6-8</sup>  | ID and/ or ASD <sup>9</sup>                               |
| <i>L1CAM</i>                | L1 cell adhesion molecule                    | dendritic arborization <sup>10</sup>         | ASD <sup>5</sup> and ID <sup>11</sup>                     |
| <i>DSCAM</i>                | Down syndrome cell adhesion molecule         | dendrite and spine development <sup>12</sup> | ASD <sup>5</sup>                                          |
| <i>CNTN4</i>                | Contactin 4                                  | neurite outgrowth <sup>13</sup>              | SZ <sup>14</sup>                                          |
| <i>NCAM1</i>                | Neuronal cell adhesion molecule 1            | neurite outgrowth <sup>15</sup>              | ASD <sup>5</sup>                                          |
| <i>PCDH10</i>               | Protocadherin 10                             | spine density <sup>16</sup>                  | ASD <sup>16</sup> and SZ <sup>17</sup>                    |
| <b>Glutamate receptors</b>  |                                              |                                              |                                                           |
| <i>GRIA1</i>                | AMPA subunit GluA1                           | spine size <sup>18</sup>                     | SZ <sup>14</sup> and ID <sup>19</sup><br>ASD <sup>5</sup> |
| <i>GRIA2</i>                | AMPA subunit GluA2                           | spine density <sup>20</sup>                  | ASD <sup>5</sup>                                          |
| <i>PRRT2</i>                | AMPA auxillary protein                       | spine density <sup>21</sup>                  | Epilepsy <sup>22</sup>                                    |
| <i>CACNG2</i>               | AMPA auxillary protein (TARP γ2)             | dendritic arborization <sup>23</sup>         | ID <sup>24</sup>                                          |
| <i>CACNG3</i>               | AMPA auxillary protein (TARP γ3)             | dendritic arborization <sup>23</sup>         | DD <sup>25</sup>                                          |
| <i>GRIN2A</i>               | NMDAR subunit GluN2A                         | dendritic arborization <sup>26</sup>         | SZ <sup>14</sup> , epilepsy <sup>27</sup>                 |
| <i>GRIN2B</i>               | NMDAR subunit GluN2B                         | spine density <sup>28,29</sup>               | ASD <sup>5</sup>                                          |

|                          |                                                                |                                                                                            |                                                          |
|--------------------------|----------------------------------------------------------------|--------------------------------------------------------------------------------------------|----------------------------------------------------------|
| <i>GRIN1</i>             | NMDAR subunit GluN1                                            | spine stability <sup>30</sup>                                                              | ASD <sup>5</sup> and epilepsy <sup>31</sup>              |
| <b>Scaffold proteins</b> |                                                                |                                                                                            |                                                          |
| <i>SHANK3</i>            | SH3 and multiple ankyrin repeat domains 3                      | dendrite and spine development <sup>32-34</sup>                                            | ASD <sup>35 5</sup>                                      |
| <i>ANK3</i>              | ankyrin 3 (Ankyrin-G)                                          | spine size and density, permits activity-dependent spine enlargement <sup>36</sup>         | BD <sup>37</sup>                                         |
| <i>DLG4</i>              | discs large MAGUK scaffold protein 4 (PSD-95)                  | spine density and size, activity-dependent structural plasticity <sup>38, 39</sup>         | ASD and/or ID <sup>40</sup>                              |
| <i>DLGAP1</i>            | DLG associated protein 1 (GKAP/SAPAP1)                         | spine size <sup>41</sup>                                                                   | ASD and/or ID <sup>40</sup>                              |
| <i>CASK</i>              | Calcium/calmodulin dependent serine protein kinase             | spine density and size <sup>42</sup>                                                       | ASD and/or ID <sup>40</sup> and DD <sup>25</sup>         |
| <i>DISC1</i>             | Disrupted in schizophrenia 1                                   | spine density and size <sup>43</sup>                                                       | Mental illness <sup>44</sup>                             |
| <b>Calcium signaling</b> |                                                                |                                                                                            |                                                          |
| <i>CACNA1C</i>           | Calcium channel Ca <sub>v</sub> 1.2                            | spine density <sup>45</sup>                                                                | BD <sup>38</sup> and SZ <sup>14</sup>                    |
| <i>CACNB4</i>            | Calcium channel β subunit 4                                    | spine density <sup>46</sup>                                                                | SZ <sup>47, 48</sup>                                     |
| <i>CAMK2B</i>            | Calcium/calmodulin dependent protein kinase II β               | activity-dependent spine formation <sup>49</sup> and dendritic arborization <sup>50</sup>  | ID <sup>51</sup>                                         |
| <i>CAMK2A</i>            | Calcium/calmodulin dependent protein kinase II α               | activity-dependent spine formation <sup>49</sup>                                           | ASD <sup>5</sup> and ID <sup>51</sup>                    |
| <i>ATP2B2</i>            | ATPase plasma membrane Ca <sup>2+</sup> transporting 2 (PMCA2) | dendritic arborization <sup>52</sup>                                                       | ASD <sup>5</sup>                                         |
| <b>GTPase signaling</b>  |                                                                |                                                                                            |                                                          |
| <i>SYNGAP1</i>           | Synaptic GTPase activating protein 1                           | spine formation, development and activity-dependent structural plasticity <sup>53-55</sup> | ID <sup>11</sup> , DD <sup>25</sup> and ASD <sup>3</sup> |
| <i>TRIO</i>              | trio Rho guanine nucleotide exchange factor                    | dendrite development and activity-dependent structural plasticity <sup>56</sup>            | ASD and/or ID <sup>40</sup>                              |
| <i>KALRN</i>             | kalirin RhoGEF kinase                                          | spine morphogenesis and activity-dependent structural plasticity <sup>57</sup>             | DD <sup>25</sup>                                         |

|                                   |                                                 |                                                                                       |                                        |
|-----------------------------------|-------------------------------------------------|---------------------------------------------------------------------------------------|----------------------------------------|
| <i>RAC1</i>                       | Rac family small GTPase 1                       | spine density and activity-dependent structural plasticity <sup>58</sup>              | DD <sup>59</sup>                       |
| <i>PAK3</i>                       | p21 (RAC1) activated kinase 3 (β-PAK)           | spine development <sup>60</sup>                                                       | ID <sup>11</sup>                       |
| <i>LIMK1</i>                      | LIM domain kinase 1                             | spine development and activity-dependent structural plasticity <sup>61</sup>          | ASD <sup>5</sup>                       |
| <i>NF1</i>                        | Neurofibromin 1                                 | spine development and activity-dependent structural plasticity <sup>62</sup>          | ID <sup>11</sup>                       |
| <i>IQGAP1</i>                     | IQ motif containing GTPase activating protein 1 | spine density <sup>63</sup>                                                           | DD <sup>25</sup>                       |
| <i>ARHGEF6</i>                    | Rho guanine nucleotide exchange factor 6        | dendrite development and spine density <sup>64</sup>                                  | ID <sup>11</sup>                       |
| <i>OPHN1</i>                      | Oligophrenin 1                                  | dendrite and spine development <sup>65</sup>                                          | ID <sup>11</sup> and DD <sup>25</sup>  |
| <i>GIT1</i>                       | GPCR kinase 2 interacting protein 1             | dendrite length and spine density <sup>66</sup>                                       | SZ <sup>17</sup>                       |
| <i>BAIAP2</i>                     | BAI1 associated protein 2 (IRS p53)             | spine density and decreased activity-dependent structural plasticity <sup>67</sup>    | SZ <sup>17</sup>                       |
| <b>Copy number variant models</b> |                                                 |                                                                                       |                                        |
| 7q11.23 deletion                  | Williams-Beuren syndrome                        | Increased dendrite length and spine number <sup>68</sup>                              | ASD <sup>3</sup>                       |
| 15q11-13 duplication              | Dup15q syndrome                                 | Increased spine turnover and decreased spine density <sup>69, 70</sup>                | ASD <sup>3</sup> and SZ <sup>2</sup>   |
| 16p11.2 duplication               | None                                            | Increased dendrite arborization <sup>71</sup>                                         | ASD <sup>3</sup> , and SZ <sup>2</sup> |
| 22q11.2 deletion                  | DiGeorge / Velocardiofacial syndrome            | Decreased spine density and stability and increased spine turnover, <sup>72, 73</sup> | SZ <sup>2</sup>                        |

As different neuropsychiatric disorders often share the same risk factors, other disease associations exist that are not referenced herein. ASD, autism spectrum disorder; BD, bipolar disorder; CNV, copy number variation; DD, developmental disorder; GWAS, genome-wide association study; ID, intellectual disability; SZ, schizophrenia.

## Supplementary References

1. Quinn, D.P. et al. Pan-neurexin perturbation results in compromised synapse stability and a reduction in readily releasable synaptic vesicle pool size. *Sci Rep* **7**, 42920 (2017).
2. Marshall, C.R. et al. Contribution of copy number variants to schizophrenia from a genome-wide study of 41,321 subjects. *Nat Genet* **49**, 27-35 (2017).
3. Sanders, S.J. et al. Insights into Autism Spectrum Disorder Genomic Architecture and Biology from 71 Risk Loci. *Neuron* **87**, 1215-33 (2015).
4. Chih, B., Engelman, H. & Scheiffele, P. Control of excitatory and inhibitory synapse formation by neuroligins. *Science* **307**, 1324-8 (2005).
5. Yuen, R.K.C. et al. Whole genome sequencing resource identifies 18 new candidate genes for autism spectrum disorder. *Nat Neurosci* **20**, 602-611 (2017).
6. Varea, O. et al. Synaptic abnormalities and cytoplasmic glutamate receptor aggregates in contactin associated protein-like 2/Caspr2 knockout neurons. *Proc Natl Acad Sci U S A* **112**, 6176-81 (2015).
7. Anderson, G.R. et al. Candidate autism gene screen identifies critical role for cell-adhesion molecule CASPR2 in dendritic arborization and spine development. *Proc Natl Acad Sci U S A* **109**, 18120-5 (2012).
8. Gdalyahu, A. et al. The Autism Related Protein Contactin-Associated Protein-Like 2 (CNTNAP2) Stabilizes New Spines: An In Vivo Mouse Study. *PLoS One* **10**, e0125633 (2015).
9. Rodenas-Cuadrado, P. et al. Characterisation of CASPR2 deficiency disorder--a syndrome involving autism, epilepsy and language impairment. *BMC Med Genet* **17**, 8 (2016).
10. Patzke, C., Acuna, C., Giam, L.R., Wernig, M. & Sudhof, T.C. Conditional deletion of L1CAM in human neurons impairs both axonal and dendritic arborization and action potential generation. *J Exp Med* **213**, 499-515 (2016).
11. Online Mendelian Inheritance in Man, OMIM®. McKusick-Nathans Institute of Genetic Medicine, Johns Hopkins University, Baltimore, MD, URL: <https://omim.org/> (accessed 12/16/17).
12. Maynard, K.R. & Stein, E. DSCAM contributes to dendrite arborization and spine formation in the developing cerebral cortex. *J Neurosci* **32**, 16637-50 (2012).
13. Mercati, O. et al. Contactin 4, -5 and -6 differentially regulate neuritogenesis while they display identical PTPRG binding sites. *Biol Open* **2**, 324-34 (2013).
14. Schizophrenia Working Group of the Psychiatric Genomics, C. Biological insights from 108 schizophrenia-associated genetic loci. *Nature* **511**, 421-7 (2014).
15. Kleene, R. et al. NCAM-induced neurite outgrowth depends on binding of calmodulin to NCAM and on nuclear import of NCAM and fak fragments. *J Neurosci* **30**, 10784-98 (2010).
16. Schoch, H. et al. Sociability Deficits and Altered Amygdala Circuits in Mice Lacking Pcdh10, an Autism Associated Gene. *Biol Psychiatry* **81**, 193-202 (2017).
17. Fromer, M. et al. De novo mutations in schizophrenia implicate synaptic networks. *Nature* **506**, 179-84 (2014).
18. Kopec, C.D., Real, E., Kessels, H.W. & Malinow, R. GluR1 links structural and functional plasticity at excitatory synapses. *J Neurosci* **27**, 13706-18 (2007).
19. Lelieveld, S.H. et al. Meta-analysis of 2,104 trios provides support for 10 new genes for intellectual disability. *Nat Neurosci* **19**, 1194-6 (2016).

20. Passafaro, M., Nakagawa, T., Sala, C. & Sheng, M. Induction of dendritic spines by an extracellular domain of AMPA receptor subunit GluR2. *Nature* **424**, 677-81 (2003).
21. Liu, Y.T. et al. PRRT2 mutations lead to neuronal dysfunction and neurodevelopmental defects. *Oncotarget* **7**, 39184-39196 (2016).
22. Heron, S.E. et al. PRRT2 mutations cause benign familial infantile epilepsy and infantile convulsions with choreoathetosis syndrome. *Am J Hum Genet* **90**, 152-60 (2012).
23. Hamad, M.I. et al. Type I TARPs promote dendritic growth of early postnatal neocortical pyramidal cells in organotypic cultures. *Development* **141**, 1737-48 (2014).
24. Hamdan, F.F. et al. Excess of de novo deleterious mutations in genes associated with glutamatergic systems in nonsyndromic intellectual disability. *Am J Hum Genet* **88**, 306-16 (2011).
25. Deciphering Developmental Disorders, S. Prevalence and architecture of de novo mutations in developmental disorders. *Nature* **542**, 433-438 (2017).
26. Kannangara, T.S. et al. Deletion of the NMDA receptor GluN2A subunit significantly decreases dendritic growth in maturing dentate granule neurons. *PLoS One* **9**, e103155 (2014).
27. Lemke, J.R. et al. Mutations in GRIN2A cause idiopathic focal epilepsy with rolandic spikes. *Nat Genet* **45**, 1067-72 (2013).
28. Liu, S. et al. A Rare Variant Identified Within the GluN2B C-Terminus in a Patient with Autism Affects NMDA Receptor Surface Expression and Spine Density. *J Neurosci* **37**, 4093-4102 (2017).
29. Brigman, J.L. et al. Loss of GluN2B-containing NMDA receptors in CA1 hippocampus and cortex impairs long-term depression, reduces dendritic spine density, and disrupts learning. *J. Neurosci.* **30**, 4590-4600 (2010).
30. Alvarez, V.A., Ridenour, D.A. & Sabatini, B.L. Distinct structural and ionotropic roles of NMDA receptors in controlling spine and synapse stability. *J Neurosci* **27**, 7365-76 (2007).
31. Epi4K Consortium et al. De novo mutations in epileptic encephalopathies. *Nature* **501**, 217-21 (2013).
32. Yi, F. et al. Autism-associated SHANK3 haploinsufficiency causes Ih channelopathy in human neurons. *Science* **352**, aaf2669 (2016).
33. Zhou, Y. et al. Mice with Shank3 Mutations Associated with ASD and Schizophrenia Display Both Shared and Distinct Defects. *Neuron* **89**, 147-62 (2016).
34. Durand, C.M. et al. SHANK3 mutations identified in autism lead to modification of dendritic spine morphology via an actin-dependent mechanism. *Mol Psychiatry* **17**, 71-84 (2012).
35. Durand, C.M. et al. Mutations in the gene encoding the synaptic scaffolding protein SHANK3 are associated with autism spectrum disorders. *Nat Genet* **39**, 25-7 (2007).
36. Smith, K.R. et al. Psychiatric risk factor ANK3/ankyrin-G nanodomains regulate the structure and function of glutamatergic synapses. *Neuron* **84**, 399-415 (2014).
37. Psychiatric, G.C.B.D.W.G. Large-scale genome-wide association analysis of bipolar disorder identifies a new susceptibility locus near ODZ4. *Nat Genet* **43**, 977-83 (2011).
38. El-Husseini, A.E., Schnell, E., Chetkovich, D.M., Nicoll, R.A. & Brecht, D.S. PSD-95 involvement in maturation of excitatory synapses. *Science* **290**, 1364-8 (2000).

39. Wu, Q., Sun, M., Bernard, L.P. & Zhang, H. Postsynaptic density 95 (PSD-95) serine 561 phosphorylation regulates a conformational switch and bidirectional dendritic spine structural plasticity. *J Biol Chem* (2017).
40. Stessman, H.A. et al. Targeted sequencing identifies 91 neurodevelopmental-disorder risk genes with autism and developmental-disability biases. *Nat Genet* **49**, 515-526 (2017).
41. Hung, A.Y., Sung, C.C., Brito, I.L. & Sheng, M. Degradation of postsynaptic scaffold GKAP and regulation of dendritic spine morphology by the TRIM3 ubiquitin ligase in rat hippocampal neurons. *PLoS One* **5**, e9842 (2010).
42. Chao, H.W., Hong, C.J., Huang, T.N., Lin, Y.L. & Hsueh, Y.P. SUMOylation of the MAGUK protein CASK regulates dendritic spinogenesis. *J Cell Biol* **182**, 141-55 (2008).
43. Hayashi-Takagi, A. et al. Disrupted-in-Schizophrenia 1 (DISC1) regulates spines of the glutamate synapse via Rac1. *Nat Neurosci* **13**, 327-32 (2010).
44. St Clair, D. et al. Association within a family of a balanced autosomal translocation with major mental illness. *Lancet* **336**, 13-6 (1990).
45. Tian, X., Kai, L., Hockberger, P.E., Wokosin, D.L. & Surmeier, D.J. MEF-2 regulates activity-dependent spine loss in striatopallidal medium spiny neurons. *Mol Cell Neurosci* **44**, 94-108 (2010).
46. MacDonald, M.L. et al. Selective loss of smaller spines in schizophrenia. *Am. J. Psychiatry* **174**, 586-294 (2017)
47. Heyes, S. et al. Genetic disruption of voltage-gated calcium channels in psychiatric and neurological disorders. *Prog Neurobiol* **134**, 36-54 (2015).
48. Purcell, S.M. et al. A polygenic burden of rare disruptive mutations in schizophrenia. *Nature* **506**, 185-90 (2014).
49. Jourdain, P., Fukunaga, K. & Muller, D. Calcium/calmodulin-dependent protein kinase II contributes to activity-dependent filopodia growth and spine formation. *J Neurosci* **23**, 10645-9 (2003).
50. Fink, C.C. et al. Selective regulation of neurite extension and synapse formation by the beta but not the alpha isoform of CaMKII. *Neuron* **39**, 283-97 (2003).
51. Kury, S. et al. De Novo Mutations in Protein Kinase Genes CAMK2A and CAMK2B Cause Intellectual Disability. *Am J Hum Genet* **101**, 768-788 (2017).
52. Sherkhane, P. & Kapfhammer, J.P. The plasma membrane Ca<sup>2+</sup>-ATPase2 (PMCA2) is involved in the regulation of Purkinje cell dendritic growth in cerebellar organotypic slice cultures. *Neural Plast* **2013**, 321685 (2013).
53. Clement, J.P. et al. Pathogenic SYNGAP1 mutations impair cognitive development by disrupting maturation of dendritic spine synapses. *Cell* **151**, 709-23 (2012).
54. Araki, Y., Zeng, M., Zhang, M. & Huganir, R.L. Rapid dispersion of SynGAP from synaptic spines triggers AMPA receptor insertion and spine enlargement during LTP. *Neuron* **85**, 173-89 (2015).
55. Vazquez, L.E., Chen, H.J., Sokolova, I., Knuesel, I. & Kennedy, M.B. SynGAP regulates spine formation. *J Neurosci* **24**, 8862-72 (2004).
56. Ba, W. et al. TRIO loss of function is associated with mild intellectual disability and affects dendritic branching and synapse function. *Hum Mol Genet* **25**, 892-902 (2016).
57. Xie, Z. et al. Kalirin-7 controls activity-dependent structural and functional plasticity of dendritic spines. *Neuron* **56**, 640-56 (2007).

58. Tashiro, A. & Yuste, R. Regulation of dendritic spine motility and stability by Rac1 and Rho kinase: evidence for two forms of spine motility. *Mol Cell Neurosci* **26**, 429-40 (2004).
59. Reijnders, M.R.F. et al. RAC1 Missense Mutations in Developmental Disorders with Diverse Phenotypes. *Am J Hum Genet* **101**, 466-477 (2017).
60. Boda, B. et al. The mental retardation protein PAK3 contributes to synapse formation and plasticity in hippocampus. *J Neurosci* **24**, 10816-25 (2004).
61. Meng, Y. et al. Abnormal spine morphology and enhanced LTP in LIMK-1 knockout mice. *Neuron* **35**, 121-33 (2002).
62. Wang, H.F. et al. Valosin-containing protein and neurofibromin interact to regulate dendritic spine density. *J Clin Invest* **121**, 4820-37 (2011).
63. Gao, C. et al. IQGAP1 regulates NR2A signaling, spine density, and cognitive processes. *J Neurosci* **31**, 8533-42 (2011).
64. Ramakers, G.J. et al. Dysregulation of Rho GTPases in the alphaPix/Arhgef6 mouse model of X-linked intellectual disability is paralleled by impaired structural and synaptic plasticity and cognitive deficits. *Hum Mol Genet* **21**, 268-86 (2012).
65. Govek, E.E. et al. The X-linked mental retardation protein oligophrenin-1 is required for dendritic spine morphogenesis. *Nat Neurosci* **7**, 364-72 (2004).
66. Menon, P. et al. Impaired spine formation and learning in GPCR kinase 2 interacting protein-1 (GIT1) knockout mice. *Brain Res* **1317**, 218-26 (2010).
67. Kang, J., Park, H. & Kim, E. IRSp53/BAIAP2 in dendritic spine development, NMDA receptor regulation, and psychiatric disorders. *Neuropharmacology* **100**, 27-39 (2016).
68. Chailangkarn, T. et al. A human neurodevelopmental model for Williams syndrome. *Nature* **536**, 338-43 (2016).
69. Isshiki, M. et al. Enhanced synapse remodelling as a common phenotype in mouse models of autism. *Nat Commun* **5**, 4742 (2014).
70. Wang, M. et al. Distinct Defects in Spine Formation or Pruning in Two Gene Duplication Mouse Models of Autism. *Neurosci Bull* **33**, 143-152 (2017).
71. Blizinsky, K.D. et al. Reversal of dendritic phenotypes in 16p11.2 microduplication mouse model neurons by pharmacological targeting of a network hub. *Proc Natl Acad Sci U S A* **113**, 8520-5 (2016).
72. Moutin, E. et al. Palmitoylation of cdc42 Promotes Spine Stabilization and Rescues Spine Density Deficit in a Mouse Model of 22q11.2 Deletion Syndrome. *Cereb Cortex* (2016).
73. Fenelon, K. et al. The pattern of cortical dysfunction in a mouse model of a schizophrenia-related microdeletion. *J Neurosci* **33**, 14825-39 (2013).
